# Supplementary material for: The neutrophil–lymphocyte ratio as a risk factor for all-cause and cardiovascular mortality among individuals with diabetes: evidence from the NHANES 2003–2016
Source: PubMed Central journal article supplement (PMC10541705; doi:10.1186/s12933-023-01998-y), 2023-09-29

# The relation of CRP and NLR

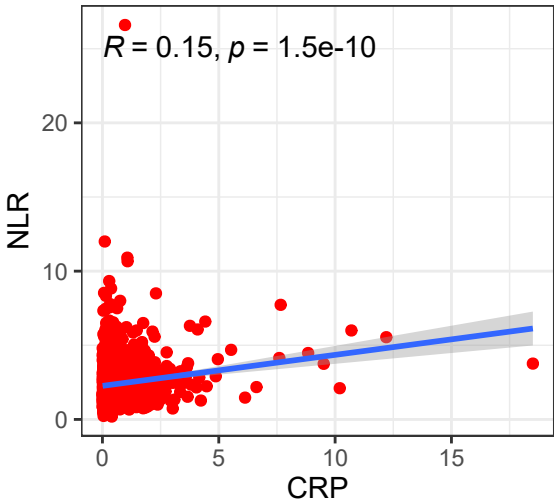

Supplement: 12933_2023_1998_MOESM2_ESM.pdf [file 12933_2023_1998_MOESM2_ESM.pdf]
